# Supplementary material
Source: PubMed Central journal article supplement (PMC7152769)

## **Supporting Information**

**HIV-1 Nef dimers short-circuit immune receptor signaling by activating Tec-family kinases at the cell membrane**

### **Contents**

**Figure S1. HIV and SIV Nef proteins induce Itk activation loop autophosphorylation at the cell membrane.**

**Figure S2. HIV and SIV Nef proteins induce Btk activation loop autophosphorylation at the cell membrane.**

**Figure S3. Dimerization-defective Nef mutants bind Itk but fail to induce kinase autophosphorylation.**

**Figure S4. Dimerization-defective Nef mutants bind Btk but fail to induce kinase autophosphorylation.**

**Figure S1. HIV and SIV Nef proteins induce Itk activation loop autophosphorylation at the cell membrane.** A) Itk was expressed either alone (Control) or together with HIV-1 Nef (SF2 isolate) or SIV Nef (mac239) as BiFC pairs in the absence or presence of the Btk/Itk inhibitor ibrutinib (1  $\mu$ M) in 293T cells. Cells were fixed and stained for confocal microscopy with phosphospecific antibodies to the Itk activation loop phosphotyrosine (pY511; red) and to the Itk protein (V5 epitope; blue). Nef interaction with Itk is observed as fluorescence complementation of the YFP variant, Venus (BiFC; green). B) Single-cell image analysis. Mean fluorescence intensities for the pY511 and Itk signals were determined for  $\geq 100$  cells from each condition using Image J. The fluorescence intensity ratio (pY511:Itk expression) for each cell is shown as a horizontal bar, with the median value indicated by the red bar. Student's t-tests demonstrated significant increases in Itk activation loop phosphorylation in the presence of both HIV-1 and SIV Nef ( $P < 0.0001$  in each case).

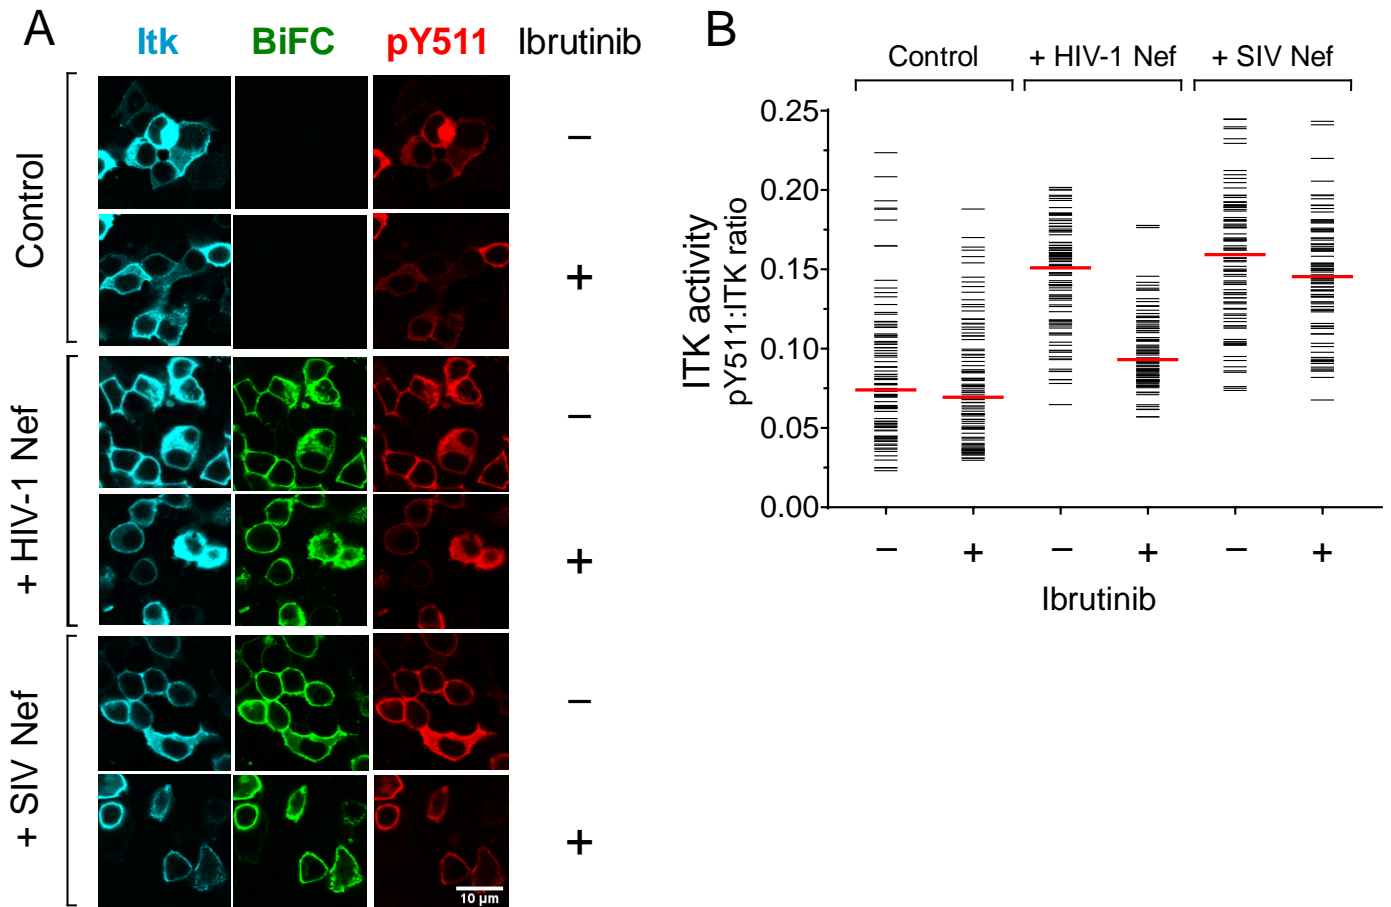

**Figure S2. HIV and SIV Nef proteins induce constitutive Btk activation loop autophosphorylation at the cell membrane.** A) Btk was expressed either alone (Control) or together with HIV-1 Nef (SF2 isolate) or SIV Nef (mac239) as BiFC pairs in the absence or presence of the Btk/Itk inhibitor ibrutinib (1  $\mu$ M) in 293T cells. Cells were fixed and stained for confocal microscopy with phosphospecific antibodies to the Btk activation loop phosphotyrosine (pY551; red) and to the Btk protein (V5 epitope; blue). Nef interaction with Btk is observed as fluorescence complementation of the YFP variant, Venus (BiFC; green). B) Single-cell image analysis. Mean fluorescence intensities for the pY551 and Btk signals were determined for  $\geq 100$  cells from each condition using Image J. The fluorescence intensity ratio (pY551:Btk expression) for each cell is shown as a horizontal bar, with the median value indicated by the red bar. Student's t-tests demonstrated significant increases in Btk activation loop phosphorylation in the presence of both HIV-1 and SIV Nef ( $P < 0.0001$  in each case).

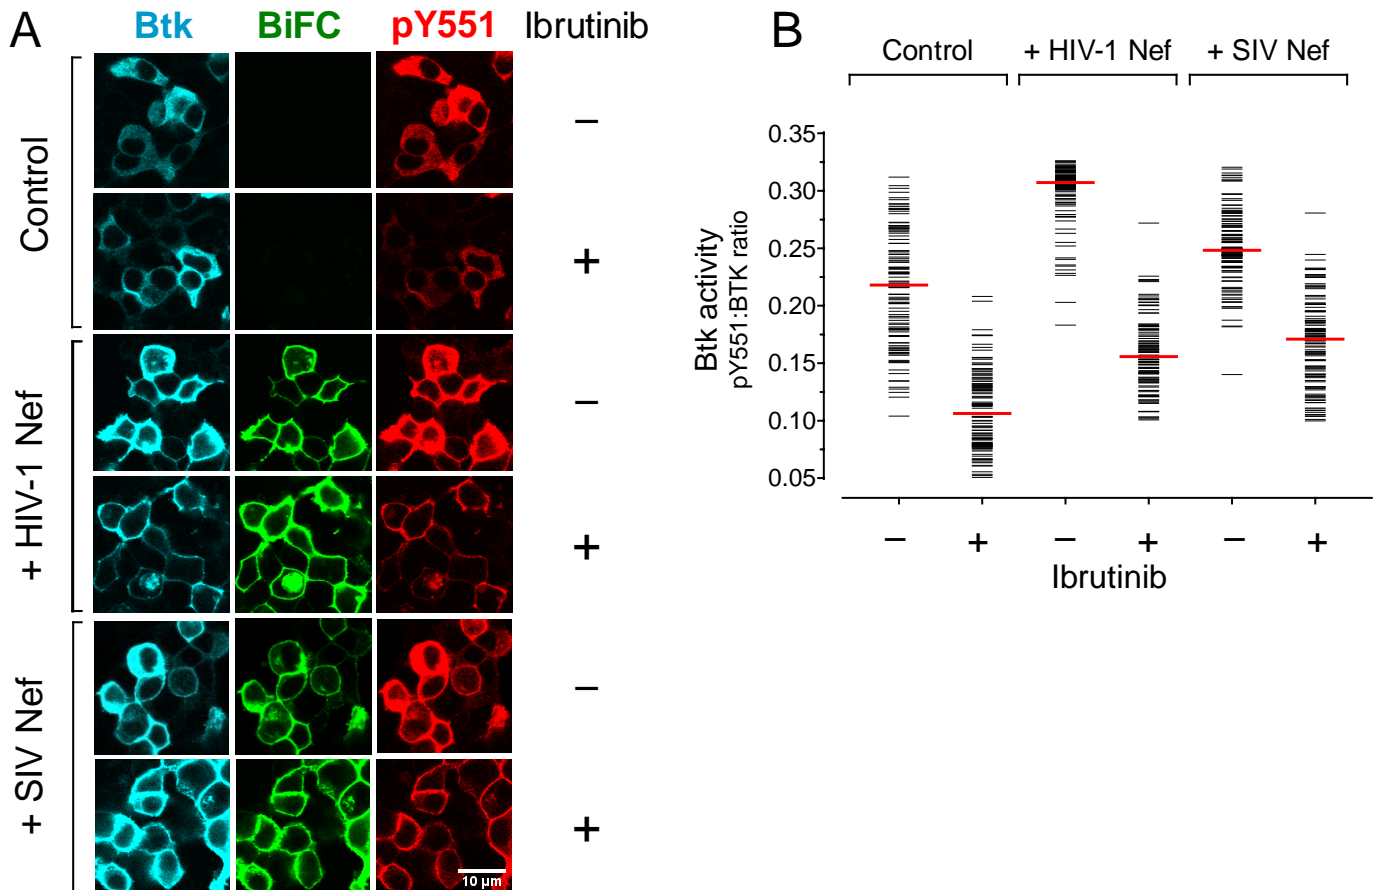

**Figure S3. Dimerization-defective Nef mutants bind Itk but fail to induce kinase autophosphorylation.** A) Itk was expressed either alone or together with wild-type Nef (WT) or homodimerization-defective mutants as BiFC pairs in 293T cells. Cells were fixed and stained for confocal microscopy with phosphospecific antibodies to the Itk activation loop phosphotyrosine (pY511; red) and to the Itk protein (V5 epitope; blue) to verify expression. Nef interaction with Itk is observed as Venus fluorescence (BiFC; green). B) Single-cell image analysis was performed as per the legend to Figure S1. The fluorescence intensity ratio (pY511:Itk expression) for each cell is shown as a horizontal bar, with the median value indicated by the red bar. Student's t-tests were performed on the groups indicated by horizontal lines above the plot;  $P < 0.0001$  in each case. In addition, ratios obtained with the F121A and LY/DD mutants were significantly lower than the baseline value observed for Itk without Nef (Control), suggesting a dominant negative effect ( $P < 0.0001$ ).

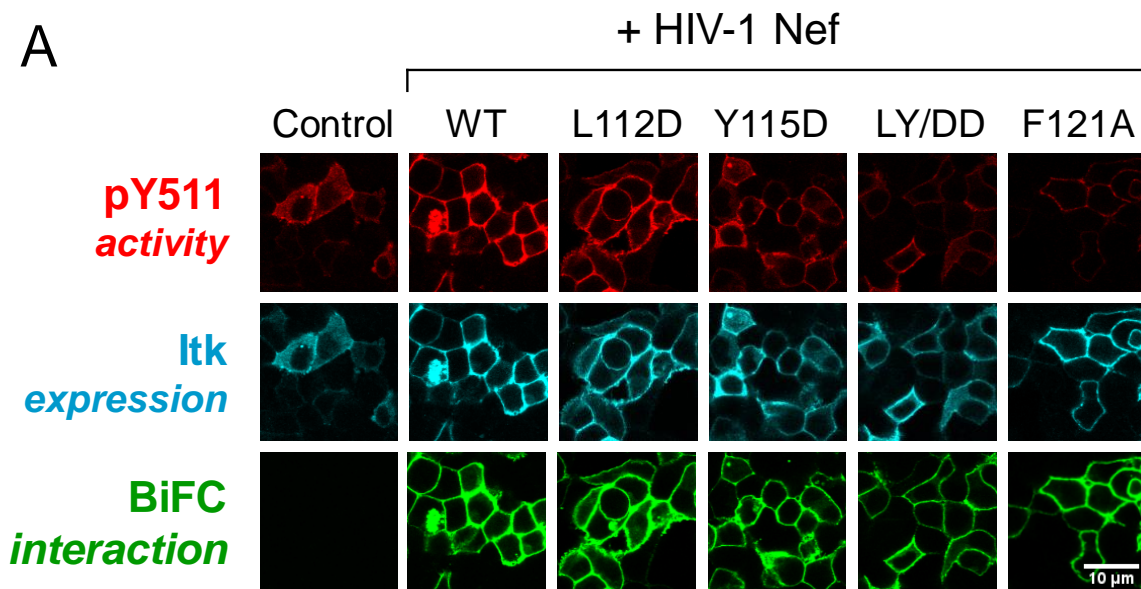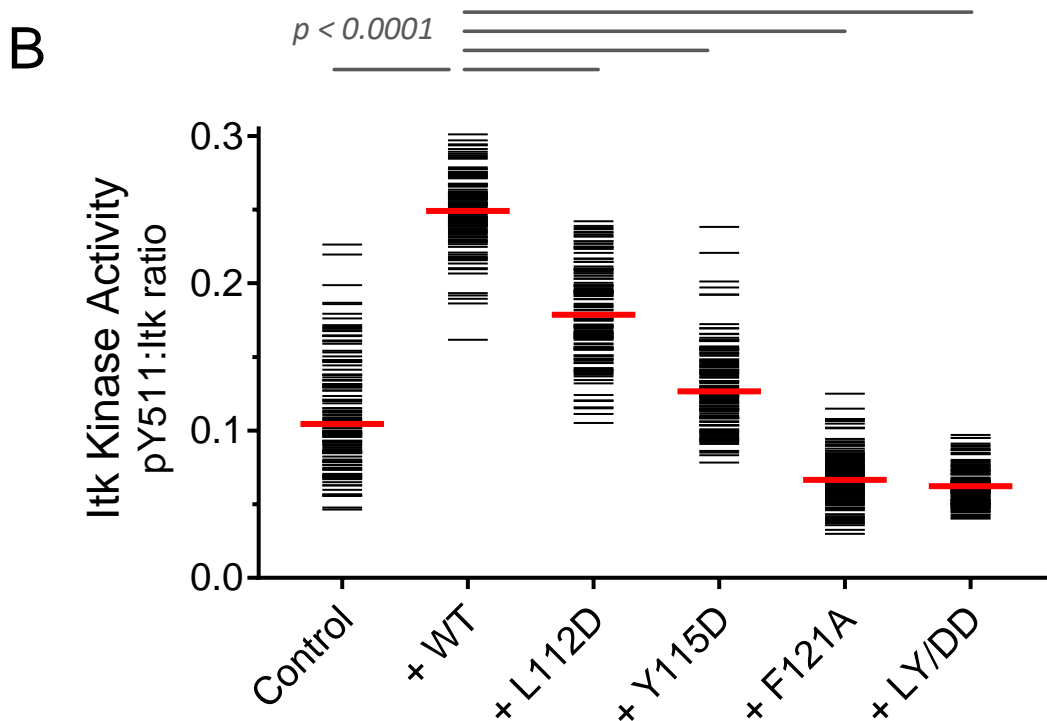

**Figure S4. Dimerization-defective Nef mutants bind Btk but fail to induce kinase autophosphorylation.** A) Btk was expressed either alone or together with wild-type Nef (WT) or homodimerization-defective mutants as BiFC pairs in 293T cells. Cells were fixed and stained for confocal microscopy with phosphospecific antibodies to the Btk activation loop phosphotyrosine (pY551; red) and to the Btk protein (V5 epitope; blue) to verify expression. Nef interaction with Btk is observed as Venus fluorescence (BiFC; green). B) Single-cell image analysis was performed as per the legend to Figure S1. The fluorescence intensity ratio (pY551:Btk expression) for each cell is shown as a horizontal bar, with the median value indicated by the red bar. Student's t-tests were performed on the groups indicated by horizontal lines above the plot;  $P < 0.0001$  in each case. In addition, ratios obtained with the F121A and LY/DD mutants were significantly lower than the baseline value observed for Btk in the absence of Nef (Control), suggesting a dominant negative effect ( $P < 0.0001$ ).

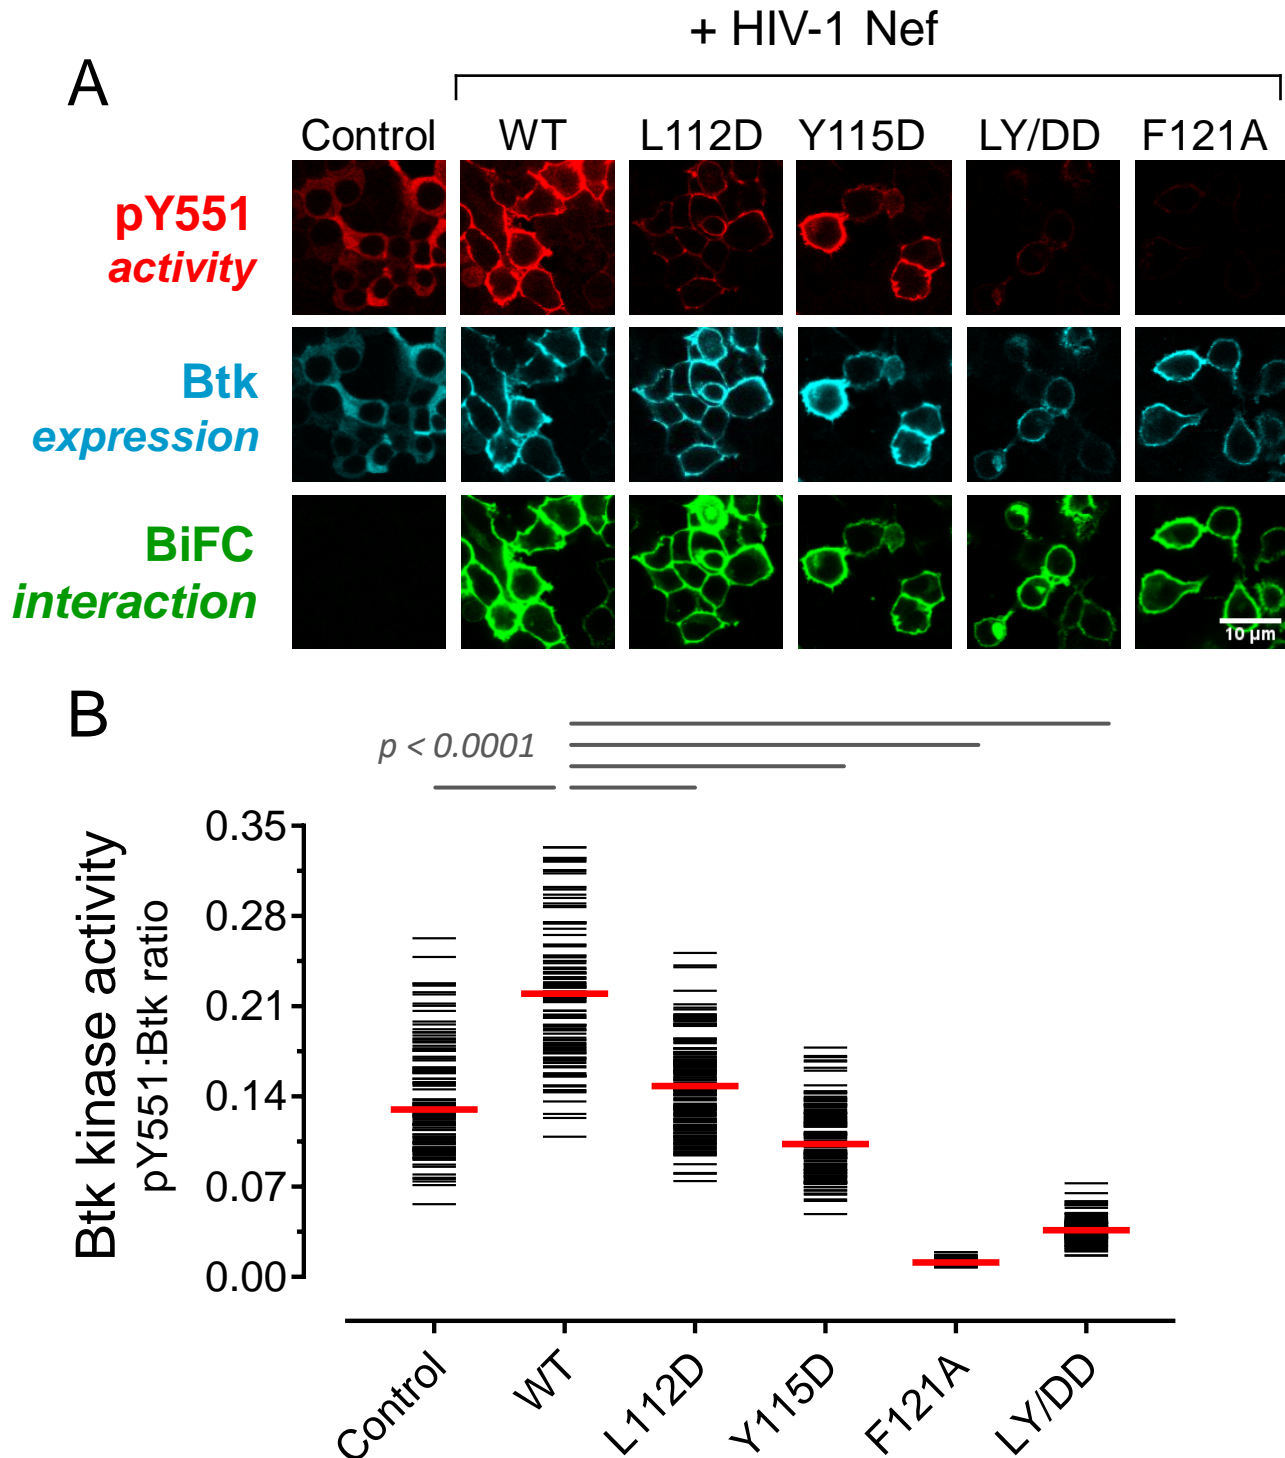

Supplement: supp_RA120.012536_158071_2_supp_486220_q6mwd9.pdf [file supp_RA120.012536_158071_2_supp_486220_q6mwd9.pdf]
